# Supplementary material
Source: Springer Nature journal article supplement (https://www.springermedizin.de/resource/supplementary/12883_2013_873_MOESM2_ESM.pdf/9456016)
Supplement: MOESM2 [file 9456016]

## a. Naïve disease modifying therapy users



## b. Experienced disease modifying therapy users
